# Supplementary material
Source: PubMed Central journal article supplement (PMC545882)
Supplement: mbc_E04-07-0553_1.pdf [file mbc_E04-07-0553_1.pdf]

```

dKLC      1  -----MTOMSQDEIITNTKTVLQGLEALRVEHVSI MNGIAEVQ-----KDN E-----
hKLC1    1  MSTMVYIKEDKLEKLTQDEIISKTKQV IQGLEALKNEHNSILOSLLETIKCLKKDDESNL
ceKLC-2a 1  -----MSNMSQDDVVTGLRRTVQQGLEALREHHS TISNTLETSSVKG-VKED EAPL
                                                    coiled-coil

dKLC      43  --KSDMLRKNIE NIELGLSEAQVMAL TSHLQNI EAEKHKLK TQVRRRLHQENAWLRDEL
hKLC1    61  VEEKSNMIRKSL EMLLELGLSEAQVMALS NHLNAV ESEKQKLR AQVRRRLCOENQWLRDEL
ceKLC-2a 49  PKQKLSQINDNLDKLVCGVDE TSLMLMV FQLTQGM DAQHOKYQAQRRRLCOENAWLRDEL

dKLC      100  AN TQQKFQASEQI VAQLEEEKKHLEFMA SVKKYDENQE-QDDACDKS-----RTDPVVELE
hKLC1    121  AN TQQKLOKSEQSVAQLEEEKKHLEFM NQLKKYDDDISPSEDKD TDS-----TKEPLDDL
ceKLC-2a 109  SS TQIKLQQSEQMVAQLEEE NKHLKYMAS IKQFDDGTQSDTKTSVDVGPQPV TNETLQEL

                                                    TPR1

dKLC      154  FPD EENED-----RHNMSPT PPSOFAN- Q TSGYEIPARLRTLHNLV IQYASQGRYEVA VPL
hKLC1    176  FPNDEDDP-----GQIQOQHS SAAAAAQGGYEIPARLRTLHNLV IQYASQGRYEVA VPL
ceKLC-2a 169  GFGPEDEEDMNASQFNQPT PANQMAAS ANVGYEIPARLRTLHNLV IQYASQGRYEVA VPL

                                                    TPR2

dKLC      209  CKQALEDLER TSGHDHPDVATMLNIALVYRDQNKYKEAANLLNDALSIRGKT LGENHPA
hKLC1    232  CKQALEDLER TSGHDHPDVATMLNIALVYRDQNKYKDAANLLNDALAI REKTLGKDHPA
ceKLC-2a 229  CKQALEDLER TSGHDHPDVATMLNIALVYRDQNKYKEAANLLNEALSIREKCLGESHPA

                                                    TPR3

dKLC      269  VAATLNNLAVLYGKRGKYKDAEPLCKRALEIREKVLGKDHPDVAKQLNNLALLCQNOGKY
hKLC1    292  VAATLNNLAVLYGKRGKYKDAEPLCKRALEIREKVLGKDHPDVAKQLNNLALLCQNOGKY
ceKLC-2a 289  VAATLNNLAVLYGKRGKFKDAEPLCKRALEIREKVLGDDHPDVAKQLNNLALLCQNOGKY

                                                    TPR4

dKLC      329  DEVEKYYQRALDIYESKLGPPDPNVAKTKNNLAGCYLKQGRY TEAEILYKQV LTRAHERE
hKLC1    352  EEVEY Y YQRAL E I Y Q T K L G P D P N V A K T K N N L A S C Y L K Q G K E K Q A E T L Y K E I L T R A H E R E
ceKLC-2a 349  EEVEKYYKRALEIYESKLGPPDPNVAKTKNNLSA Y L K Q G K Y K E A E E L Y K Q I L T R A H E R E

                                                    TPR5

dKLC      389  FGAIDSKNKPIWQVAEERE EHKFDNRENTPYGEYGGWHKAAKVDSPVT T T L K N L G A L Y R
hKLC1    412  FGSVD DENKPIWMHAERE ECKGKQKDGTSFGEYGGWYKACKVDSPVT T T L K N L G A L Y R
ceKLC-2a 409  FGQISGENKPIWQVAEERE ENKHKG-EGATANEQA G W A K A A K V D S P T V T T L K N L G A L Y R

                                                    TPR6

dKLC      449  RQGMFEAAETLED CAMRSKRE--AYDLAKQTKLSQLLTSNE---KRRSK-----AIK--
hKLC1    472  RQGFEEAAETLEEAAMRSRKQ--GLDNVHKQRVAEVLNDPENMEKRRSR E S L N V D V V K Y E
ceKLC-2a 468  RQGYEEAAETLEDVALRAKKQHEPLRS GAMG G I D E M S Q S M M A S T I G G S R -----

dKLC      496  -----EDLDFSE EKNAKP-----
hKLC1    530  SGPDGGE E V S M S V E W N G D G T G S L K R S G S F S K L R A S I R R S E K L V R K L K G G S S R E S E P K N P
ceKLC-2a 517  -----NSMTTSTSTQ TGLKNKLMNALGFNS-----

dKLC
hKLC1    590  GMKRASSLNLVNLVGGKAAEDRFQGVSGRASFCGKRQQQQWPGRHR
ceKLC-2a

```

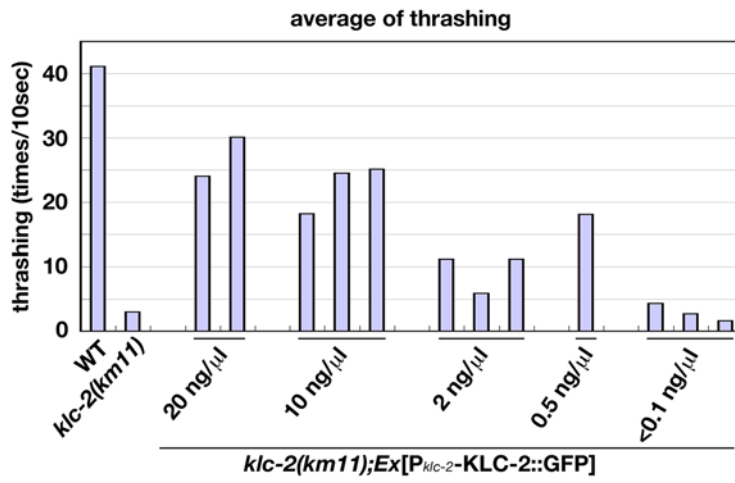

***Punc-25-KLC-2::GFP* (2ng/ $\mu$ l)**

array#1 #1

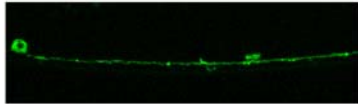

array#1 #2

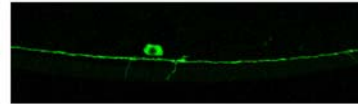

array#2 #1

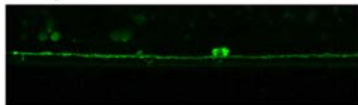

array#3 #1

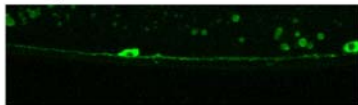

array#3 #2

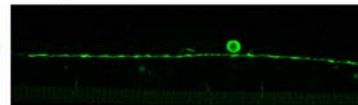

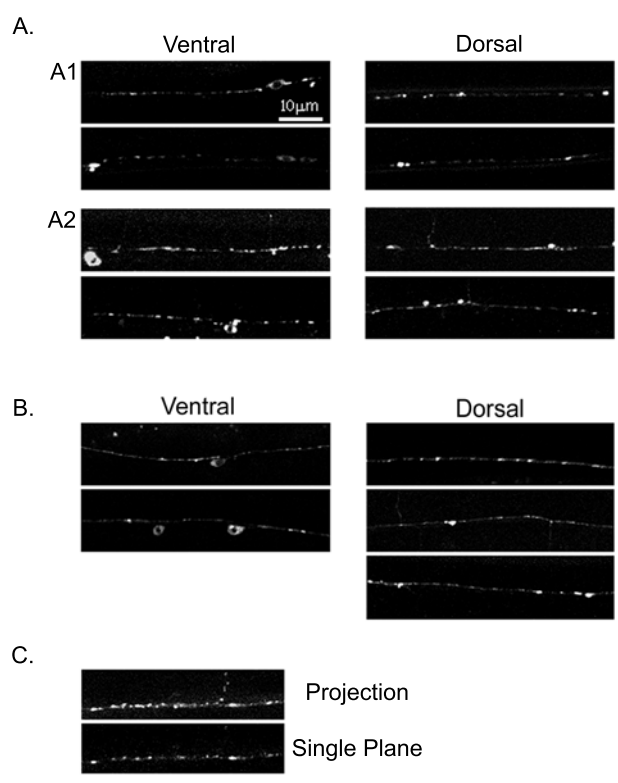

Supplementary Table 1. Transgene rescue of *klc-2(km11)* at different concentrations

| Genotype                  | <i>Ex</i> [ <i>P<sub>klc-2</sub></i> -KLC-2-GFP] transgene (conc. ng/ $\mu$ l) | Thrashing (times/10sec) |                      |                     | n  |
|---------------------------|--------------------------------------------------------------------------------|-------------------------|----------------------|---------------------|----|
|                           |                                                                                | Average                 | Highest <sup>1</sup> | Lowest <sup>2</sup> |    |
| N2                        | N/A                                                                            | 41.1                    | 48                   | 33                  | 30 |
| <i>klc-2(km11)</i>        | N/A                                                                            | 3.0                     | 20                   | 0                   | 30 |
| <i>klc-2(km11)</i>        | <i>kmEx 807 (20)</i>                                                           | 24.0                    | 38                   | 2                   | 22 |
|                           | <i>kmEx 808 (20)</i>                                                           | 30.1                    | 44                   | 16                  | 25 |
|                           | <i>kmEx 850 (10)</i>                                                           | 18.2                    | 37                   | 0                   | 30 |
|                           | <i>kmEx 851 (10)</i>                                                           | 24.5                    | 36                   | 6                   | 30 |
|                           | <i>kmEx 852 (10)</i>                                                           | 25.1                    | 34                   | 6                   | 30 |
|                           | <i>kmEx 853 (2)</i>                                                            | 11.2                    | 38                   | 0                   | 30 |
|                           | <i>kmEx 854 (2)</i>                                                            | 5.9                     | 17                   | 0                   | 30 |
|                           | <i>kmEx 855 (2)</i>                                                            | 11.2                    | 40                   | 0                   | 30 |
|                           | <i>kmEx 856 (0.5)</i>                                                          | 18.1                    | 40                   | 0                   | 30 |
|                           | <i>kmEx 857 (&lt;0.1)</i>                                                      | 4.3                     | 30                   | 0                   | 30 |
|                           | <i>kmEx 858 (&lt;0.1)</i>                                                      | 2.7                     | 14                   | 0                   | 30 |
| <i>kmEx 859 (&lt;0.1)</i> | 1.6                                                                            | 7                       | 0                    | 10                  |    |

*klc-2(km11)* mutants exhibited uncoordinated movement compared with the wild type in a thrashing assay (Miller et al, 1996). The movement defects of *klc-2(km11)* animals were rescued by expressing *P<sub>klc-2</sub>*-KLC-2-GFP at the concentrations as specified.

1) Highest means the highest frequency of thrashing in each strain.

2) Lowest means the lowest frequency of thrashing in each strain.

n= number of animals scored

## Supplementary Figure legends

Supp. Figure 1. Sequence alignment KLC2 with KLC from Drosophila and human.

Supp. Figure 2. Dosage-dependent rescue of *klc-2* by P<sub>*klc-2*</sub> KLC-2::GFP transgenes.

Supp. Figure 3. Images of Punc-25 KLC-2::GFP at 2ng/μl from independent lines. The localization is indistinguishable from those at 20ng/μl as in Figure 4B. No GFP can be seen below 2ng /μl. Array#1 is *km844*; array#2 is *km845*; array#3 is *km846*.

Supp. Figure 4. Images of UNC-16::XFP. A. *Punc-25UNC-16::CFP* localization at low (A1, *juEx834*) and moderate (A2, *juEx836*) expression levels. B. *Punc-25UNC-16::GFP* localization (*juEx841*). Images in A and B are shown as projections of confocal images. No difference for CFP, YFP or GFP (A, B and Figure 5). C. *Punc-25UNC-16::CFP* (*juEx836*) images shown by focal plane. GFP pattern may vary slightly depending on the concentration and image projection.
